# Supplementary material
Source: publisher figshare collection journal article supplement (https://gsajournals.figshare.com/articles/dataset/_/12273146)
Supplement: Supplementary file 1 [file 2]

Supplementary Figures

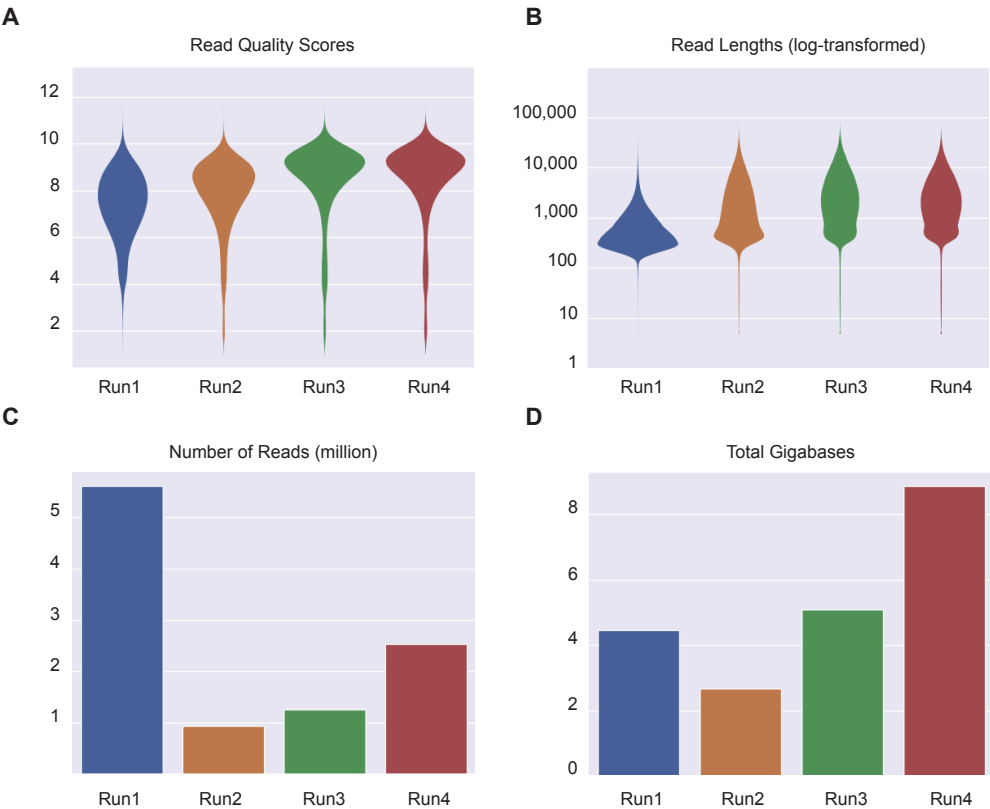

**Supplementary Figure 1: Comparison of the data output and read lengths between all four MinION sequencing runs.** Run 1: Oxford Nanopore Technologies (ONT) 1D sequencing kit (SQK-LSK109) and Run 2-4: ONT Rapid sequencing kit (SQK-RAD004). A) Read quality scores of the four different runs, B) bog-transformed read lengths, C) numbers of reads, and D) the total amount of sequencing data generated.

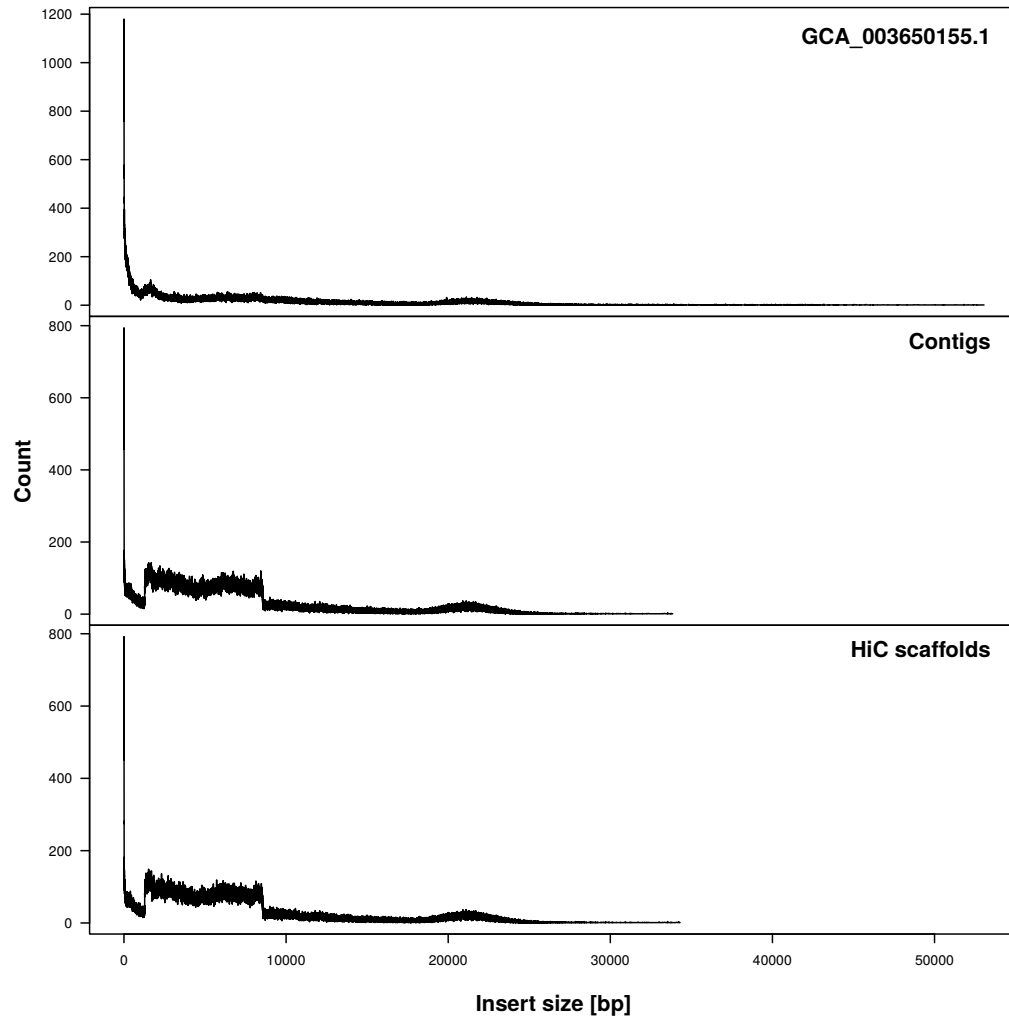

**Supplementary Figure 2: Insert sizes of the 5 kbp mate pair read library of Fan et al. (2018), mapped against the chromosome-level assembly of Fan et al. (2018) (GCA\_003650155.1; top panel), our nanopore-based baseline assembly (middle panel) and our chromosome-level assembly (bottom panel).**

betta\_assembly.blobDB.json.bestsum.phylum.p8.span.100.blobplot.covsum

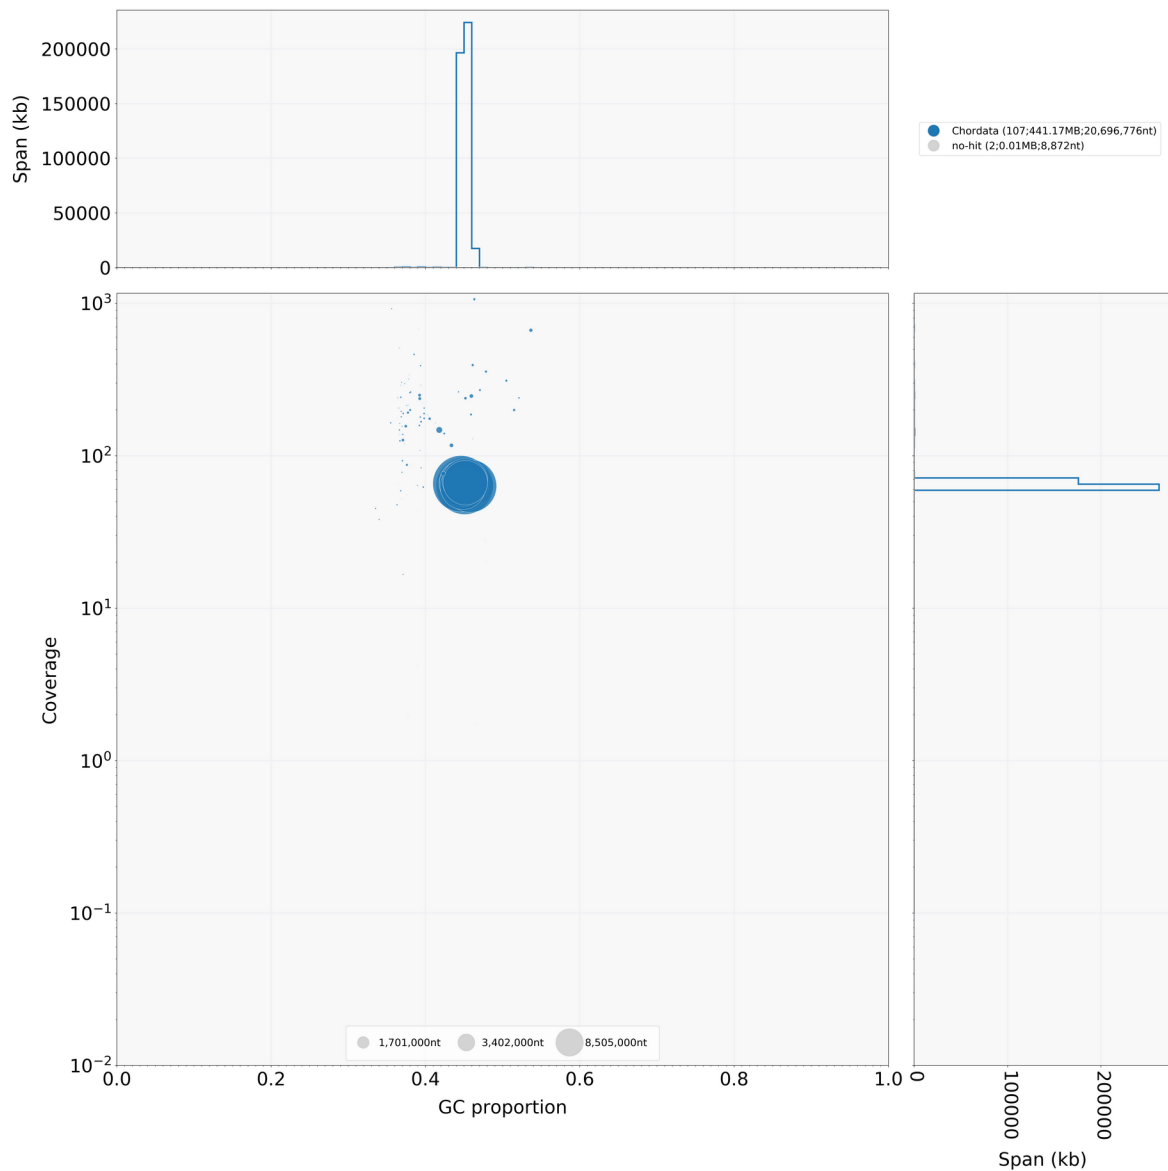

**Supplementary Figure 3: Blobtools plot showing the taxonomic assignments (blue colour for Chordata, and gray for “no hits”) of the different scaffolds, and scaffold-wide coverage and GC contents. The scaffolds were blasted against the NCBI nucleotide database.**

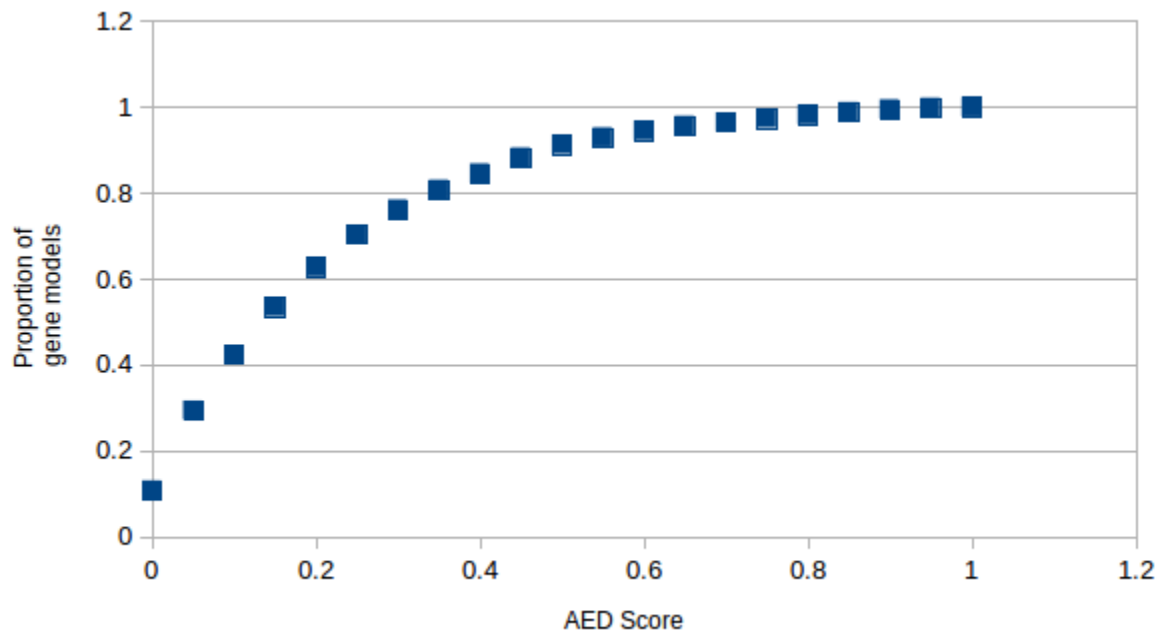

**Supplementary Figure 4. Distribution of Annotation Edit Distance (AED) scores.** About 90% of all gene models show AED scores of  $< 0.5$  indicating a high quality of our gene models.
